# Supplementary material for: Isolation and Investigation of Potential Non-Saccharomyces Yeasts to Improve the Volatile Terpene Compounds in Korean Muscat Bailey A Wine
Source: PubMed Central journal article supplement (PMC7601120; doi:10.3390/microorganisms8101552), 2020-10-08
Supplement: microorganisms-08-01552-s001.pdf [file microorganisms-08-01552-s001.pdf]

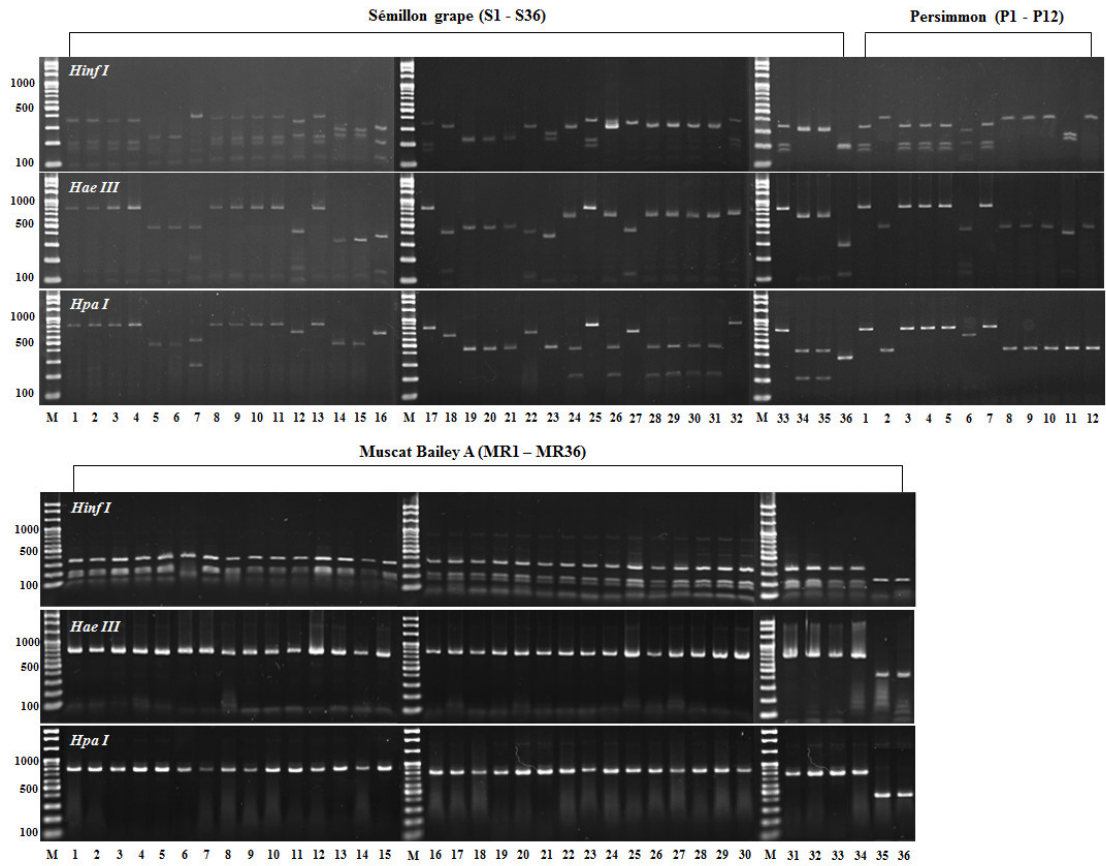

**Figure S1.** Polymerase chain reaction restriction fragment length polymorphism (PCR-RFLP) analysis of amplified ITS I-5.8S-ITS II region of 84 isolates from Sémillon grape (S), persimmon (P), and Muscat Bailey A grape (MR). The DNA fragments were amplified from the yeast chromosomal DNA with ITS1 and ITS 4 primers, digested with *Hinf I*, *Hae III*, and *Hpa I*, and resolved on a 2.0% agarose gel. Lane M represents a 100-bp plus DNA ladder used as a DNA size marker.

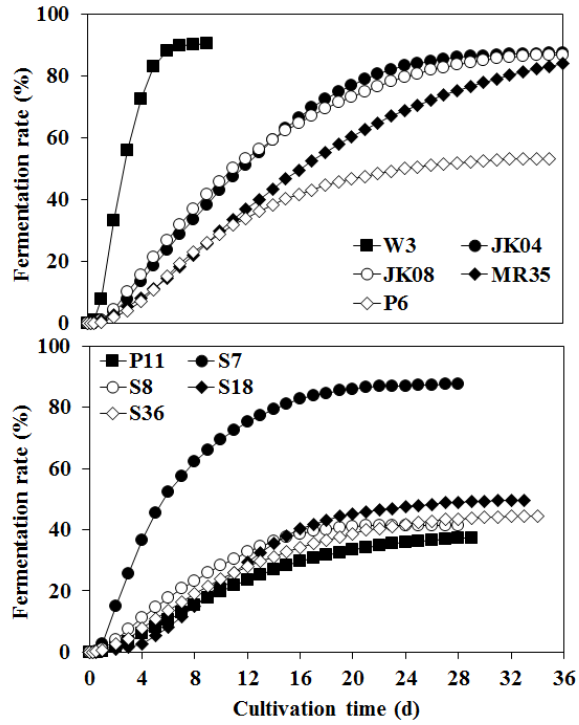

**Figure S2.** Fermentation rates of nine non-*Saccharomyces* yeasts and the control strain *Saccharomyces cerevisiae* W-3. Fermentation rate was calculated based on carbon dioxide reduction from the total glucose concentration (20%) until the completion of ethanol fermentation. W3, *S. cerevisiae* W-3; JK04, *Wickerhamomyces anomalus* JK04; JK08, *Torulaspora delbrueckii* JK08; MR35, *Starmerella bacillaris* MR35; P6, *Candida quercitrusa* P6; P11, *Pichia kluyveri* P11; S7, *Hanseniaspora vineae* S7; S8, *H. uvarum* S8; S18, *C. railenensis* S18; S36, *Metschnikowia pulcherrima*.

**Table S1.** Diversity of yeasts isolated from various food materials such as Sémillon grape (S), persimmon (P) and Muscat Bailey A grape (MR).

| Strains                          | Number of strains depending on the origin |           |           | Isolates                                                     |
|----------------------------------|-------------------------------------------|-----------|-----------|--------------------------------------------------------------|
|                                  | Sémillon grape                            | Persimmon | MBA grape |                                                              |
| <i>Hanseniaspora uvarum</i>      | 13                                        | 5         | 34        | S (1-4, 8*-11, 13, 17, 25, 32, 33), P (1, 3-5, 7), MR (1-34) |
| <i>Starmerella bacillaris</i>    | 5                                         | 5         | 2         | S (5, 6, 19-21), P (2, 8-10, 12), MR (35*, 36)               |
| <i>Candida quercitrusa</i>       | 1                                         | 1         |           | S (16), P (6*)                                               |
| <i>Pichia kluyveri</i>           | 3                                         | 1         |           | S (14-15, 23), P (11*)                                       |
| <i>Hanseniaspora vineae</i>      | 9                                         |           |           | S (7*, 24, 26, 28, 29-31, 34, 35)                            |
| <i>Candida railenensis</i>       | 4                                         |           |           | S (12, 18*, 22, 27)                                          |
| <i>Metschnikowia pulcherrima</i> | 1                                         |           |           | S (36*)                                                      |
| <b>Total</b>                     | 36                                        | 12        | 36        | 84                                                           |

The isolates marked with an asterisk (\*) showed the highest OD value among each of the species when cultured in sterilized MBA grape juice at 30 °C for 48 h and were selected for further study.
